# Supplementary material for: Genetic compensation in a stable slc25a46 mutant zebrafish: A case for using F0 CRISPR mutagenesis to study phenotypes caused by inherited disease
Source: PubMed Central journal article supplement (PMC7092968; doi:10.1371/journal.pone.0230566), 2020-03-24

S1 Fig.

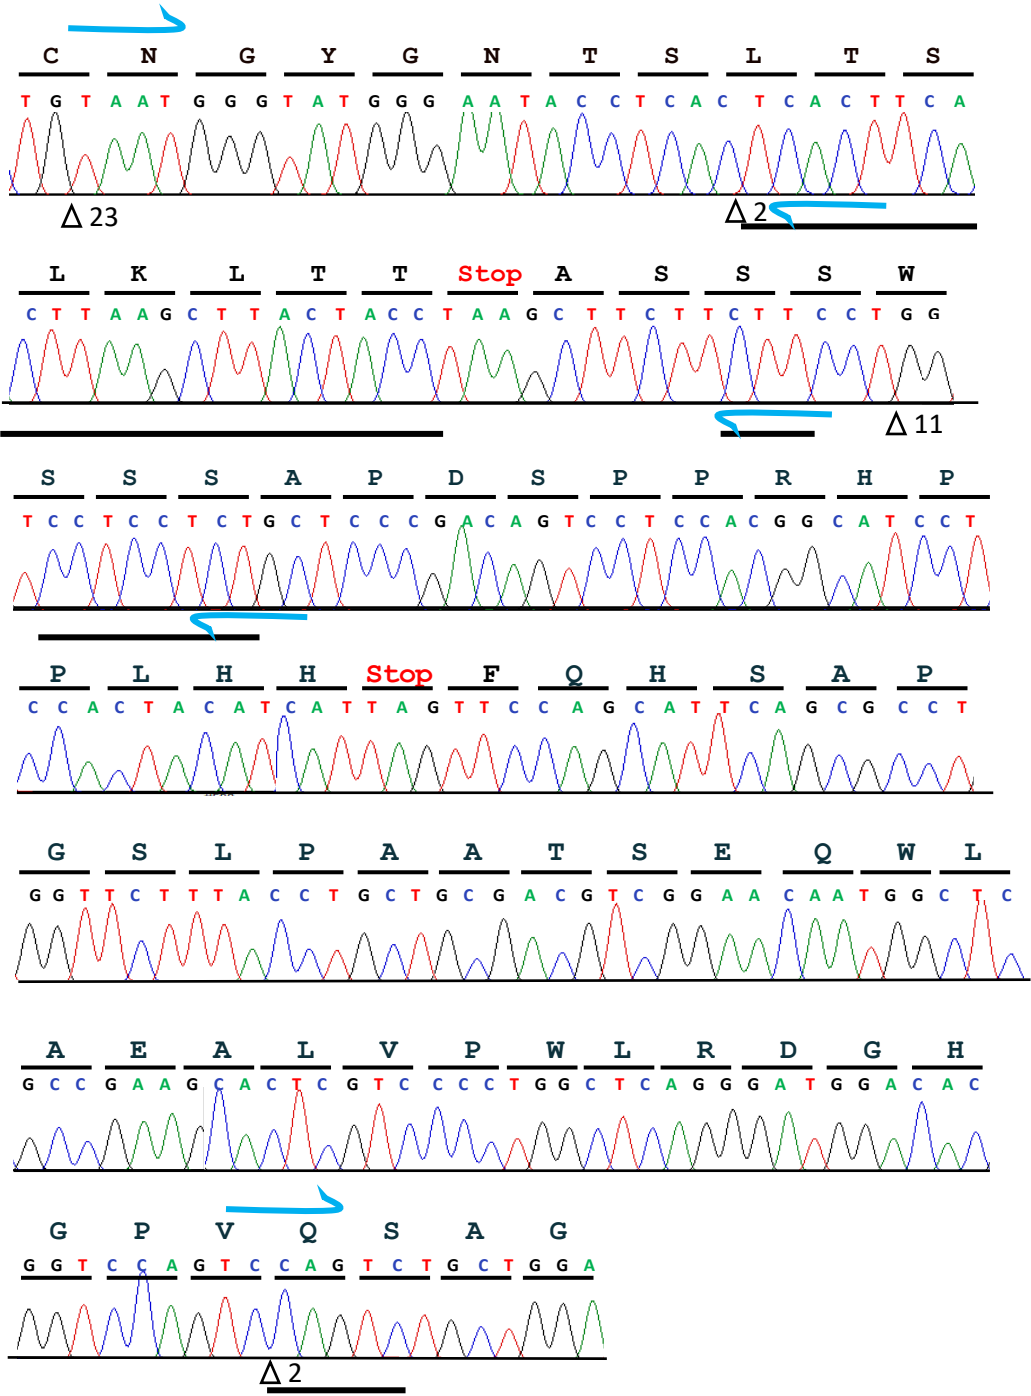

Supplement: pone.0230566.s001.pdf [file pone.0230566.s001.pdf]
