# Supplementary material for: Genetic compensation in a stable slc25a46 mutant zebrafish: A case for using F0 CRISPR mutagenesis to study phenotypes caused by inherited disease
Source: PubMed Central journal article supplement (PMC7092968; doi:10.1371/journal.pone.0230566), 2020-03-24
Supplement: pone.0230566.s007.pdf [file pone.0230566.s007.pdf]

**S1 Table. Primers and Target sites.**

| <b>RT-PCR primers</b>                                       |                           |                         |
|-------------------------------------------------------------|---------------------------|-------------------------|
| <b>Gene_exon</b>                                            | <b>Forward Sequence</b>   | <b>Reverse Sequence</b> |
| n4bp3_exons 1-2                                             | TGTCCCAATCTCTGGAGGAC      | TTTCAGCTCCGTCACCTCCT    |
| slc6a19b_exons 1-2                                          | AAGCCCAATACATGCTGACC      | AGTCCTCCAGACACCCACAC    |
| mdh1ab_exons 1-2                                            | CGTGAGGAAAATAGGGGTGA      | CAATGCCGTACAGCAGAGAG    |
| serpina10a_exons 2-3                                        | AGAAGGTCAGGGATGTGGTG      | AGAACGGAGCATCATGGGTA    |
| Anxa6_exons 3-4                                             | CGAGACCTGGAAGCAGATGT      | GAGCATCTTCCTCCACAAGG    |
| slc25a46_exons 3-4                                          | CACCCCTGCATTGTGTTTC       | GGTGACATTGTACATCACACTGA |
| <b>PCR primers for RT-PCR, Sanger and Fragment analysis</b> |                           |                         |
| Slc25a46 - exon 8                                           | tccagtcttcatccagtgttc     | CGGCAAAGCTGGCCATGAG     |
| Slc25a46 - exon 5                                           | GGAAAGGAATGGGAAGCACT      |                         |
| <b>Slc25a46 Single Guides for CRISPR</b>                    |                           |                         |
| <b>strand</b>                                               | <b>Target sequence</b>    | <b>PAM site</b>         |
| -                                                           | GGGAGCACCAGGTTCCAGAG      | AGG                     |
| +                                                           | GGACACGGTCCAGTCTATGC      | TGG                     |
| -                                                           | GGAAGAAGACGCTTACTGTG      | AGG                     |
| -                                                           | GGAGGACTGTCTGGGAGCACC     | AGG                     |
| +                                                           | GGAGGGTCTGGGACGTGTAA      | TGG                     |
| <b>Morpholino</b>                                           |                           |                         |
| SLC25A46_MO_ex7_in7                                         | AGTGTATCAAACCTCTTACCTGTAC |                         |
