# Supplementary material for: Genetic compensation in a stable slc25a46 mutant zebrafish: A case for using F0 CRISPR mutagenesis to study phenotypes caused by inherited disease
Source: PubMed Central journal article supplement (PMC7092968; doi:10.1371/journal.pone.0230566), 2020-03-24
Supplement: pone.0230566.s011.pdf [file pone.0230566.s011.pdf]

**S5 Table. Statistical measures and raw counts.**

| genotype / treatment                  |                           | Motoneuron phenotype observed<br>n (3 trials) |              | Total N | p (normal/total)        |
|---------------------------------------|---------------------------|-----------------------------------------------|--------------|---------|-------------------------|
|                                       |                           | normal                                        | disrupted    |         |                         |
| <b>Wild-type</b>                      | Slc25a46 F0 CRISPR        | 10 (3,2,3)                                    | 23 ( 7,8,10) | 33      | 0.24 (0.3, 0.2, 0.23)   |
|                                       | Slc25a46 F0 CRISPR + hRNA | 19 (6,6,7)                                    | 9 (4,3,2)    | 28      | 0.68 (0.6, 0.67, 0.78)  |
|                                       | Control Cas9              | 30 (10,10,10)                                 | 0 (0, 0, 0)  | 30      | 1 (1,1,1)               |
|                                       | Slc25a46 ex3 MO           | 5 (2, 2, 1)                                   | 25 (8, 8, 9) | 30      | 0.17 (0.20, 0.20, 0.10) |
|                                       | Slc25a46 ex7 MO           | 10 (5, 2, 3)                                  | 19 (7, 6, 6) | 29      | 0.33 (0.42, 0.25, 0.33) |
|                                       | Control MO                | 24 (9, 9, 6)                                  | 0 (0, 0, 0)  | 24      | 1 (1,1,1)               |
|                                       | uninjected                | 20 (6,6,8)                                    | 0 (0, 0, 0)  | 20      | 1 (1,1,1)               |
| <b><i>slc25a46</i><sup>238s</sup></b> | Slc25a46 CRISPR           | 17 (6, 6, 5)                                  | 0 (0, 0, 0)  | 17      | 1 (1,1,1)               |
|                                       | Slc25a46 ex3 MO           | 16 (6, 6, 4)                                  | 9 (3, 2, 4)  | 25      | 0.64 (0.67, 0.75, 0.50) |
|                                       | Slc25a46 ex7 MO           | 43 (18, 16, 9)                                | 2 (1, 0, 1)  | 45      | 0.96 (0.97, 1, 0.9)     |
|                                       | Control MO                | 30 (8, 13, 9)                                 | 1 ( 0, 1, 0) | 31      | 0.97 (1, 0.92, 1)       |
|                                       | uninjected                | 33 (10, 13, 10)                               | 0 (0, 0, 0)  | 33      | 1 (1,1,1)               |

| Comparison Configuration                   | p1   | n1 | actual $\alpha$ | Odds ratio | Power |
|--------------------------------------------|------|----|-----------------|------------|-------|
|                                            | p2   | n2 |                 |            |       |
| slc25a46 F0 CRISPR                         | 0.24 | 33 | 0.03            | 0.15       | 0.95  |
| slc25a46 F0 CRISPR + hRNA                  | 0.68 | 28 |                 |            |       |
| slc25a46 F0 CRISPR                         | 0.24 | 33 | 0               | 0          | 1     |
| WT Control Cas9                            | 1    | 30 |                 |            |       |
| slc25a46 F0 CRISPR                         | 0.24 | 33 | 0               | 0          | 1     |
| <i>slc25a46</i> <sup>238s</sup> uninjected | 1    | 20 |                 |            |       |
| slc25a46 F0 CRISPR                         | 0.24 | 33 | 0               | 0          | 1     |
| <i>Slc25a46</i> <sup>238s</sup> CRISPR     | 1    | 17 |                 |            |       |
| <i>Slc25a46</i> <sup>238s</sup> ex3 MO     | 0.64 | 25 | 0.03            | 8.68       | 0.97  |
| WT ex3 MO                                  | 0.17 | 30 |                 |            |       |
| WT ex7 MO                                  | 0.33 | 29 | 0               | 0          | 0.99  |
| WT Control MO                              | 1    | 24 |                 |            |       |
| <i>Slc25a46</i> <sup>238s</sup> ex7 MO     | 0.96 | 45 | 0.05            | 44.57      | 0.99  |
| WT ex7 MO                                  | 0.33 | 29 |                 |            |       |
