# Supplementary material for: Genetic compensation in a stable slc25a46 mutant zebrafish: A case for using F0 CRISPR mutagenesis to study phenotypes caused by inherited disease
Source: PLoS One. 2020 Mar 24;15(3):e0230566. doi: 10.1371/journal.pone.0230566 (PMC7092968; doi:10.1371/journal.pone.0230566)
Supplement: S3 Table — (XLSX) [file pone.0230566.s009.xlsx]

## Sheet: Sheet1
		Transcripts Per Million Values											Statistical Results
		Control				SLC_F4				Averages
GeneID	geneName	Control 1	Control 2	Control 3		SLC_F4 1	SLC_F4 2	SLC_F4 3		Control	SLC_F4		Fold Change (SLC_F4/Control)	P-Value	Direction
ENSDARG00000088069	CR759879.1	0.784367	0.533465	0.458388		0	0	0		0.592073	0		0	2.19625e-12	Downregulated
ENSDARG00000046091	si:ch211-283g2.1	0.347707	1.01072	0.348966		0	0	0		0.569132	0		0	1.04378e-09	Downregulated
ENSDARG00000100740	si:ch73-46n24.6	1.23961	0.681712	0.458874		0	0	0		0.7934	0		0	3.82818e-08	Downregulated
ENSDARG00000035797	si:dkey-17m8.2	0.561761	1.17571	0.403942		0	0	0		0.713805	0		0	7.43982e-08	Downregulated
ENSDARG00000095595	si:ch211-283e2.7	0.527208	0.302715	0.150435		0	0	0		0.326786	0		0	9.39471e-07	Downregulated
ENSDARG00000104113	TRIM35 (37 of 38)	0.147805	1.37844	0.0474472		0	0	0		0.524564	0		0	2.50327e-06	Downregulated
ENSDARG00000103036	CABZ01032351.2	0.105664	0.998221	0.0904511		0	0	0		0.398112	0		0	6.04854e-05	Downregulated
ENSDARG00000092380	HTRA2 (11 of 24)	0.0873953	0.444574	0.243142		0	0	0		0.258371	0		0	0.000249689	Downregulated
ENSDARG00000102437	BX321875.2	0.0593304	0.287438	0.279337		0	0	0		0.208702	0		0	0.000346375	Downregulated
ENSDARG00000096740	si:dkeyp-67e6.3	0.186172	0.270584	0		0	0	0		0.152252	0		0	0.000355577	Downregulated
ENSDARG00000062811	p2ry10	0.153048	0.296588	0.0748648		0	0	0		0.174833	0		0	0.000388202	Downregulated
ENSDARG00000093824	si:dkey-20f20.3	0.11894	0.172868	0.139997		0	0	0		0.143935	0		0	0.000442635	Downregulated
ENSDARG00000094298	si:ch73-191k20.1	0	0.460066	0.406455		0	0	0		0.28884	0		0	0.000452991	Downregulated
ENSDARG00000070299	IL17RA (2 of 4)	0.137303	0.106431	0.0352606		0	0	0		0.0929981	0		0	0.000463193	Downregulated
ENSDARG00000100429	irgf4	0.0652756	0.252993	0.167634		0	0	0		0.161967	0		0	0.00146553	Downregulated
ENSDARG00000040781	sult3st4	0.190058	0	0.187725		0	0	0		0.125927	0		0	0.00194091	Downregulated
ENSDARG00000079471	si:dkey-88j15.4	0.0510394	0.263755	0.058255		0	0	0		0.12435	0		0	0.00194738	Downregulated
ENSDARG00000097446	si:ch211-66i15.5	0.0722135	0.0524779	0.169996		0	0	0		0.0982293	0		0	0.00205401	Downregulated
ENSDARG00000104203	ugt5b5p	0.0694361	0.0168198	0.104019		0	0	0		0.0634249	0		0	0.00256905	Downregulated
ENSDARG00000043676	BX936423.1	0.204158	0.346179	0.131074		0	0	0		0.227137	0		0	0.00257586	Downregulated
ENSDARG00000103653	si:ch73-266m14.1	0.157967	0.183673	0.10818		0	0	0		0.14994	0		0	0.00258898	Downregulated
ENSDARG00000026663	tlr19	0.0618993	0.143944	0.0317926		0	0	0		0.079212	0		0	0.00271902	Downregulated
ENSDARG00000103208	il17ra1	0.0635171	0.135397	0.021749		0	0	0		0.0735545	0		0	0.00372742	Downregulated
ENSDARG00000096767	si:ch211-250m6.8	0.134805	0.154367	0		0	0	0		0.0963906	0		0	0.0038868	Downregulated
ENSDARG00000097611	si:ch73-304f21.2	0	0.220479	0.0547837		0	0	0		0.0917542	0		0	0.00392733	Downregulated
ENSDARG00000096858	si:ch211-121k8.4	0.354982	0.375225	0		0	0	0		0.243402	0		0	0.00410514	Downregulated
ENSDARG00000087968	or122-2	0.0444665	0.107713	0.171291		0	0	0		0.107823	0		0	0.00418707	Downregulated
ENSDARG00000101705	CR388047.1	0.077462	0.0965005	0.00947282		0	0	0		0.0611451	0		0	0.00599087	Downregulated
ENSDARG00000105232	C7H19orf12 (4 of 4)	0.0838022	0.0811992	0.466291		0	0	0		0.210431	0		0	0.00623031	Downregulated
ENSDARG00000002097	si:dkeyp-52c3.7	0	0	0.309527		0	0	0		0.103176	0		0	0.00683519	Downregulated
ENSDARG00000090863	si:dkey-184n3.2	0.0509161	0.123336	0.0653785		0	0	0		0.079877	0		0	0.00685087	Downregulated
ENSDARG00000077809	il13	0.0652083	0.410689	0.0558202		0	0	0		0.177239	0		0	0.00699971	Downregulated
ENSDARG00000087592	si:dkey-14o1.14	0.0401441	0.388972	0.0343645		0	0	0		0.154494	0		0	0.00795733	Downregulated
ENSDARG00000093087	si:ch211-225p5.10	0.272357	0.0659744	0.233146		0	0	0		0.190492	0		0	0.0081111	Downregulated
ENSDARG00000095762	taar10c	0.0589429	0.171336	0.201828		0	0	0		0.144036	0		0	0.00934727	Downregulated
ENSDARG00000083837	FP017217.1	0.902669	2.62389	0.772711		0	0	0		1.43309	0		0	0.00964587	Downregulated
ENSDARG00000005924	serpina10a	18.8189	28.7964	10.7984		0.0410422	0.0734413	0		19.4712	0.0381612		0.00195987	2.17268e-25	Downregulated
ENSDARG00000042698	si:dkey-15j16.6	4.34326	14.8186	2.32552		0	0.026946	0.0307443		7.16246	0.0192301		0.00268485	2.15793e-11	Downregulated
ENSDARG00000077090	PLXNB2 (3 of 5)	1.77835	2.14042	1.22499		0.0166347	0	0		1.71459	0.00554489		0.00323396	6.87827e-13	Downregulated
ENSDARG00000103480	BX640512.1	1.753	0.143136	1.59336		0.0117915	0	0		1.16316	0.00393051		0.00337916	4.10758e-08	Downregulated
ENSDARG00000039682	DUPD1 (1 of 11)	64.6452	39.7809	56.6448		0.324872	0.163499	0.108818		53.6903	0.199063		0.00370761	6.97442e-27	Downregulated
ENSDARG00000099153	si:dkey-48g21.6	1.53366	1.22597	0.754894		0	0.0308048	0		1.17151	0.0102683		0.008765	2.86676e-08	Downregulated
ENSDARG00000097776	ZSCAN20	0.936101	1.13378	2.80466		0	0.0470059	0		1.62485	0.0156686		0.00964314	1.37098e-06	Downregulated
ENSDARG00000098309	CR524823.2	0.925032	3.34389	0.121824		0	0	0.0652278		1.46358	0.0217426		0.0148557	1.15473e-05	Downregulated
ENSDARG00000043196	rnasel2	1.48558	0.575776	0.508681		0.0395269	0	0		0.85668	0.0131756		0.0153799	1.29661e-06	Downregulated
ENSDARG00000102710	si:dkey-62k3.4	1.58986	1.54048	1.012		0	0.0655049	0		1.38078	0.021835		0.0158135	4.81293e-08	Downregulated
ENSDARG00000070138	HTRA2 (3 of 24)	0.0123944	0.732577	0.13793		0.01484	0	0		0.2943	0.00494668		0.0168083	0.000128127	Downregulated
ENSDARG00000102818	si:ch211-253h3.4	0.793804	0.730691	0.203856		0	0.0318884	0		0.576117	0.0106295		0.0184502	3.52381e-05	Downregulated
ENSDARG00000096083	si:dkey-21h14.8	1.47837	2.69985	0.906184		0.0582742	0.0146639	0.0334618		1.6948	0.0354666		0.0209267	2.7674e-10	Downregulated
ENSDARG00000042683	si:dkey-15j16.3	1.82601	6.47628	0.432561		0.0137504	0	0.178967		2.91162	0.0642393		0.0220631	2.38343e-05	Downregulated
ENSDARG00000100796	CR847850.1	0.906654	0.979857	0.597018		0	0.0560335	0		0.827843	0.0186778		0.022562	3.93764e-06	Downregulated
ENSDARG00000100039	si:ch211-285j16.2	0.69521	0.374231	0.330622		0	0	0.0354048		0.466688	0.0118016		0.025288	0.000208904	Downregulated
ENSDARG00000092569	si:dkey-73n10.7p	0.081217	1.37715	0.139048		0.0486212	0	0		0.532472	0.0162071		0.0304374	0.00179531	Downregulated
ENSDARG00000098316	si:ch211-128b10.8	0.0732601	0.0532384	0.109747		0	0.00735744	0		0.0787486	0.00245248		0.0311431	0.00332255	Downregulated
ENSDARG00000097459	si:dkey-125e8.3	0.139639	0.169128	0.313781		0.020899	0	0		0.207516	0.00696635		0.0335702	7.18081e-05	Downregulated
ENSDARG00000104985	CR847850.2	1.34104	4.50965	0.506459		0.0472251	0	0.180781		2.11905	0.0760021		0.0358661	5.48403e-05	Downregulated
ENSDARG00000096967	si:dkey-207j16.10	2.36212	4.10069	2.2748		0	0.316301	0		2.91254	0.105434		0.0361999	5.99548e-06	Downregulated
ENSDARG00000098004	si:dkey-101o7.7	0.057269	0.147974	0.212437		0	0.0153373	0		0.139227	0.00511242		0.0367201	0.00787026	Downregulated
ENSDARG00000092351	si:dkey-149f22.2	0.282645	0.882456	0.29572		0	0.0252318	0.0287884		0.48694	0.0180067		0.0369793	0.000917441	Downregulated
ENSDARG00000097539	si:ch211-39f2.3	0.0182077	0.0793897	0.0363681		0	0	0.00556357		0.0446552	0.00185452		0.0415298	0.0021775	Downregulated
ENSDARG00000089310	gc	1.64631	0.170911	1.14085		0.11733	0.0157464	0		0.986023	0.0443589		0.0449877	0.00087357	Downregulated
ENSDARG00000103788	si:rp71-1d10.6	0.132467	0.149745	0.0944965		0	0.0177381	0		0.125569	0.00591269		0.047087	0.00186783	Downregulated
ENSDARG00000099050	CR847822.1	1.94103	13.2452	0.494939		0.19779	0.132722	0.416435		5.22707	0.248982		0.0476332	0.000322441	Downregulated
ENSDARG00000071588	BX539307.1	1.28401	8.74164	0.4628		0	0.0542955	0.464617		3.49615	0.172971		0.0494747	0.00055113	Downregulated
ENSDARG00000097024	ugt1b4	0.111703	0.126273	0.0478107		0	0.0149577	0		0.0952622	0.00498589		0.0523386	0.00984922	Downregulated
ENSDARG00000006678	pth2r	2.47597	3.65724	2.43037		0.289864	0.079571	0.0907873		2.85453	0.153407		0.0537418	3.23004e-08	Downregulated
ENSDARG00000097398	si:ch73-288o11.4	1.22154	0.430399	0.80802		0	0.13383	0		0.819985	0.0446101		0.0544036	0.00301713	Downregulated
ENSDARG00000079762	si:dkey-253d23.4	6.22425	11.5003	4.24414		0.282677	0.284526	0.678777		7.32291	0.415326		0.0567161	9.28659e-10	Downregulated
ENSDARG00000022631	cyp2p9	1.8975	0.617232	1.22984		0.194735	0.0108894	0.0124243		1.24819	0.0726829		0.0582306	3.60492e-05	Downregulated
ENSDARG00000074546	si:ch211-213a13.11	0.385995	0.59431	0.144843		0.0189928	0.0127447	0.0339294		0.375049	0.0218889		0.0583628	1.07337e-05	Downregulated
ENSDARG00000090169	si:dkey-1f1.3	7.47863	8.72519	4.83411		0	0.122624	1.11927		7.01264	0.413965		0.0590312	6.58581e-06	Downregulated
ENSDARG00000069734	zgc:92880	1.79839	3.2025	4.61844		0	0.273357	0.311889		3.20644	0.195082		0.0608407	2.16994e-05	Downregulated
ENSDARG00000098759	CU469587.1	0.462343	0.149327	0.395779		0.0615078	0	0		0.335816	0.0205026		0.061053	0.00141212	Downregulated
ENSDARG00000085497	RNaseP_nuc	0.954164	0.821801	1.36132		0	0	0.19437		1.04576	0.06479		0.0619549	0.00154971	Downregulated
ENSDARG00000099482	BX569782.1	0.177754	1.13311	0.128137		0.0336043	0	0.060032		0.479667	0.0312121		0.0650704	0.0034152	Downregulated
ENSDARG00000070121	rhoh	0.694948	1.08774	0.183045		0.128011	0	0		0.655244	0.0426704		0.0651213	0.00902921	Downregulated
ENSDARG00000095061	si:dkey-167k11.1	0.235479	2.05348	0.403154		0	0.0315319	0.143906		0.897372	0.0584794		0.0651674	0.00544903	Downregulated
ENSDARG00000093761	si:ch211-250k18.7	0.215333	0.723737	0.207373		0	0.037845	0.037011		0.382148	0.024952		0.0652942	5.84843e-05	Downregulated
ENSDARG00000055479	mmp20b	0.569877	0.511773	0.249865		0	0.0781708	0.0127414		0.443838	0.030304		0.0682772	0.000120633	Downregulated
ENSDARG00000097541	si:ch73-239g21.1	0.734731	0.427146	0.534608		0	0.118061	0		0.565495	0.0393537		0.0695917	0.000576738	Downregulated
ENSDARG00000037619	BX569798.1	0.143065	1.45552	0.142879		0	0.0574713	0.0655724		0.580487	0.0410146		0.0706554	0.00778878	Downregulated
ENSDARG00000042332	plin2	1.46123	4.00908	1.26403		0.165748	0.148295	0.169199		2.24478	0.16108		0.0717577	6.5653e-06	Downregulated
ENSDARG00000079078	si:xx-by187g17.1	1.49071	0.0465938	1.48191		0.0575758	0.115905	0.0440809		1.0064	0.0725205		0.072059	0.00289109	Downregulated
ENSDARG00000098586	zgc:194887	7.54053	1.15007	9.56284		0.0417981	0.869479	0.480019		6.08448	0.463765		0.076221	0.000404989	Downregulated
ENSDARG00000094260	si:ch211-286e11.3	0	0.750155	0.2549		0	0	0.0818883		0.335018	0.0272961		0.0814764	0.00671681	Downregulated
ENSDARG00000095893	si:dkey-85n7.7	0.218943	0.190928	0.206163		0	0.0527717	0		0.205345	0.0175906		0.0856636	0.00239148	Downregulated
ENSDARG00000096207	SRR (2 of 2)	8.94967	0.57463	1.93837		0.129103	0.823004	0.0494218		3.82089	0.333843		0.0873731	0.00660978	Downregulated
ENSDARG00000068749	si:ch211-250k18.5	0.575811	1.00099	0.449419		0.0506932	0.0612298	0.0698607		0.675405	0.0605946		0.0897159	9.84596e-06	Downregulated
ENSDARG00000013907	KBTBD13 (1 of 3)	0.18315	0.354923	0.450748		0.0274111	0	0.062959		0.329607	0.0301234		0.0913917	0.00511443	Downregulated
ENSDARG00000011076	MREG	22.4622	3.60686	16.709		0.171423	3.02911	0.802046		14.2594	1.33419		0.0935661	0.000768015	Downregulated
ENSDARG00000087706	dicp3.3	0.793804	0.615319	1.30468		0	0.255107	0		0.9046	0.0850357		0.0940036	0.00152075	Downregulated
ENSDARG00000104403	oscp1a	1.26962	0.608616	1.26987		0.176015	0.0751617	0.0612545		1.04937	0.104144		0.0992442	8.53706e-05	Downregulated
ENSDARG00000100886	si:dkeyp-97a10.1	7.64186	5.03917	8.9342		0.211799	1.25068	0.810782		7.20508	0.757754		0.10517	2.80637e-05	Downregulated
ENSDARG00000007349	dmrt1	0.419907	0.6899	0.382895		0.0546479	0.0660065	0.058575		0.497567	0.0597431		0.12007	8.16639e-05	Downregulated
ENSDARG00000090193	si:ch73-286h23.4	0.160826	0.173145	0.107078		0.0534888	0	0		0.147017	0.0178296		0.121276	0.00269037	Downregulated
ENSDARG00000095512	rca2.2	0.506073	0.510368	0.203345		0.0370977	0.0331915	0.0852077		0.406596	0.0518323		0.127479	0.000145289	Downregulated
ENSDARG00000074191	zgc:172253	2.37766	1.62622	2.34132		0.0186066	0.374567	0.427366		2.11507	0.273513		0.129316	0.000296763	Downregulated
ENSDARG00000016412	agt	7.86991	0.62126	12.6505		0.29717	2.15196	0.303357		7.04721	0.917496		0.130193	0.0065199	Downregulated
ENSDARG00000054786	faah2b	1.44262	0.314508	0.58659		0	0.159369	0.148773		0.78124	0.102714		0.131476	0.00285109	Downregulated
ENSDARG00000097019	dhrs13b	0.227443	0.507383	0.407507		0.00633304	0.0679944	0.0775788		0.380778	0.0506354		0.132979	0.0011385	Downregulated
ENSDARG00000100311	si:dkey-165e24.1	0.975784	1.10827	0.862958		0.131533	0.0830703	0.177712		0.982338	0.130772		0.133123	2.51065e-05	Downregulated
ENSDARG00000077998	nitr3a	0.102624	0.369334	0.150598		0.0175533	0.0117787	0.0537562		0.207519	0.0276961		0.133463	0.00313748	Downregulated
ENSDARG00000090052	BX470211.1	0.917012	0.408594	0.481307		0.00801425	0.134445	0.104309		0.602304	0.0822561		0.136569	0.00116464	Downregulated
ENSDARG00000093518	si:ch73-186j5.4	0.630188	0.692029	0.611387		0.0251511	0.0675084	0.173305		0.644535	0.0886548		0.137548	0.000445351	Downregulated
ENSDARG00000086265	bsnd	1.81858	0.829222	1.19046		0	0.171895	0.359563		1.27942	0.177153		0.138463	0.00159609	Downregulated
ENSDARG00000097173	si:ch211-281l24.4	2.48767	2.47066	3.03456		0.521242	0.199867	0.399071		2.6643	0.373393		0.140147	0.000135721	Downregulated
ENSDARG00000079105	mhc2dab	0.617748	0.491675	0.887647		0.290573	0	0		0.66569	0.0968575		0.145499	0.00857753	Downregulated
ENSDARG00000097746	si:rp71-77l1.1	55.534	25.021	78.192		2.98894	16.5056	3.9015		52.9157	7.79869		0.14738	0.000218527	Downregulated
ENSDARG00000071644	si:dkey-19a16.7	2.19314	1.56684	0.934373		0.121009	0.19488	0.379849		1.56479	0.231913		0.148207	0.000231393	Downregulated
ENSDARG00000092870	si:dkey-100n23.4	80.5689	56.3751	112.333		11.984	15.6228	10.1907		83.0923	12.5991		0.151628	1.21628e-06	Downregulated
ENSDARG00000070506	CR450842.1	1.46217	2.81665	0.864245		0.0833659	0.0559409	0.686132		1.71436	0.275146		0.160495	0.00376396	Downregulated
ENSDARG00000093176	zgc:77118	2.17511	1.607	1.69903		0.130214	0.502421	0.249235		1.82705	0.293957		0.160892	0.000967331	Downregulated
ENSDARG00000097639	si:ch73-265h17.4	0.316779	0.511566	0.180781		0	0.0678694	0.0967953		0.336375	0.0548882		0.163176	0.00669965	Downregulated
ENSDARG00000098537	SPATA22	0.226129	0.0751217	0.110613		0.0618851	0	0.00592252		0.137288	0.0226025		0.164636	0.0093	Downregulated
ENSDARG00000093402	RNH1 (12 of 55)	0.632095	0.740822	0.417969		0.140487	0.0273689	0.135316		0.596962	0.101057		0.169286	0.000349791	Downregulated
ENSDARG00000098881	si:dkey-238i5.3	2.91412	6.2575	3.10563		0.653581	0.587011	0.862214		4.09242	0.700935		0.171277	4.06907e-05	Downregulated
ENSDARG00000057899	zgc:114081	2.67264	2.71229	2.42031		0.959997	0.0791105	0.335258		2.60175	0.458122		0.176082	0.000886556	Downregulated
ENSDARG00000090689	hbbe1.2	2787.7	985.092	4093.9		80.4659	1042.57	291.644		2622.23	471.558		0.179831	0.00282252	Downregulated
ENSDARG00000093600	omd	0.475344	0.246739	0.77022		0.0813053	0.0818372	0.108935		0.497434	0.0906925		0.18232	0.00492059	Downregulated
ENSDARG00000104775	si:ch211-134a4.1	3.2441	2.83183	5.3039		0.524893	0.962729	0.589404		3.79328	0.692342		0.182518	0.000839604	Downregulated
ENSDARG00000093570	si:dkey-25o1.7	0.988259	1.43634	1.08391		0.184884	0.0248125	0.45296		1.1695	0.220886		0.188871	0.00263526	Downregulated
ENSDARG00000086569	zgc:172051	0.608483	1.28321	0.439173		0.0285704	0.0766863	0.339047		0.776956	0.148101		0.190617	0.00358092	Downregulated
ENSDARG00000058508	CFAP70	0.79314	0.978928	0.573876		0.0565261	0.197239	0.199075		0.781981	0.150947		0.193031	0.00125207	Downregulated
ENSDARG00000039501	ugt2a6	0.671803	0.307387	0.670931		0.0446867	0.119944	0.153958		0.55004	0.106196		0.19307	0.0030411	Downregulated
ENSDARG00000103309	BX664625.3	2.11819	0.834875	2.91962		0.128957	0.721113	0.296194		1.95756	0.382088		0.195185	0.00894771	Downregulated
ENSDARG00000097513	si:ch211-84k18.3	4.08958	3.06958	5.3005		0.517237	1.20321	0.739209		4.15322	0.819886		0.19741	0.00112753	Downregulated
ENSDARG00000035151	si:dkey-261j4.3	3.46552	1.40183	2.50576		0.26185	0.810964	0.400953		2.4577	0.491256		0.199884	0.00205925	Downregulated
ENSDARG00000043126	blf	5.20718	6.5421	4.64834		0.781713	0.767636	1.76628		5.46587	1.10521		0.202202	0.000230231	Downregulated
ENSDARG00000103177	BX571760.2	0.429842	1.3536	0.689921		0.32166	0.107922	0.0738805		0.824453	0.167821		0.203554	0.00475638	Downregulated
ENSDARG00000098012	itgae.1	1.91402	1.64329	2.831		0.246573	0.583969	0.477504		2.12944	0.436015		0.204756	0.00128008	Downregulated
ENSDARG00000093964	si:ch211-250k18.6	0.310518	0.30787	0.414173		0.121047	0.0348112	0.0595772		0.344187	0.0718119		0.208642	0.00139357	Downregulated
ENSDARG00000055591	pipox	5.794	3.39961	5.48338		0.809346	1.09912	1.32782		4.89233	1.07876		0.2205	0.000468003	Downregulated
ENSDARG00000079310	st3gal1l	0.453407	0.597481	0.256166		0.0325723	0.131141	0.124689		0.435685	0.0961343		0.220651	0.00376905	Downregulated
ENSDARG00000081926	SNORD33	19.9958	7.7499	7.18915		2.39413	3.53436	1.83298		11.645	2.58716		0.22217	0.00691127	Downregulated
ENSDARG00000097137	si:dkeyp-116a7.2	2.50498	3.26925	2.62572		1.16297	0.451804	0.281176		2.79998	0.631985		0.22571	0.00296522	Downregulated
ENSDARG00000088330	si:ch211-5k11.2	861.175	451.684	1385.72		31.3194	348.935	255.426		899.526	211.893		0.235561	0.0035093	Downregulated
ENSDARG00000097431	si:dkey-242n9.2	2.92532	2.0975	1.60266		0.245177	0.705088	0.643581		2.20849	0.531282		0.240563	0.00784425	Downregulated
ENSDARG00000071578	si:ch211-222k6.3	2.50811	3.21896	2.41069		0.895632	0.565642	0.544534		2.71259	0.668602		0.246482	0.0020099	Downregulated
ENSDARG00000075641	steap3	3.09337	1.98872	2.32172		0.368618	0.659609	0.806343		2.46794	0.611523		0.247787	0.00250591	Downregulated
ENSDARG00000012388	cox4i1l	20.4007	29.6663	31.1671		2.06472	7.032	11.2743		27.078	6.79033		0.250769	0.000922748	Downregulated
ENSDARG00000094975	si:ch211-214p16.2	8.25972	3.90154	7.99857		1.42161	2.03231	1.60895		6.71994	1.68763		0.251137	0.00486643	Downregulated
ENSDARG00000104037	ASPG (3 of 3)	4.0055	3.46872	3.66456		0.569507	0.985559	1.35397		3.71293	0.969678		0.261162	0.0029095	Downregulated
ENSDARG00000088308	notchl	7.68605	13.9155	4.79428		2.21378	2.00371	2.74929		8.79862	2.32226		0.263934	0.000206081	Downregulated
ENSDARG00000020133	jdp2b	3.77928	35.8158	35.2463		7.42256	4.10179	8.29632		24.9471	6.60689		0.264835	0.00427117	Downregulated
ENSDARG00000040179	zgc:101562	1.85429	1.77396	2.67234		0.252931	0.603463	0.839142		2.1002	0.565179		0.269107	0.00880481	Downregulated
ENSDARG00000011519	myl4	26.7451	18.0507	23.4585		4.06982	7.53662	7.80188		22.7514	6.46944		0.284354	0.000499255	Downregulated
ENSDARG00000017388	gstt1b	28.2753	19.6349	31.1838		3.34855	12.9867	6.40926		26.3647	7.58151		0.287563	0.00342935	Downregulated
ENSDARG00000075766	sccpdha	4.18479	2.11118	2.88656		0.99382	1.08368	0.72918		3.06084	0.935561		0.305655	0.00963967	Downregulated
ENSDARG00000097110	si:dkey-56f14.4	5.36638	5.28987	2.38983		1.35562	0.71028	2.07576		4.34869	1.38055		0.317464	0.00906593	Downregulated
ENSDARG00000095643	si:dkey-253d23.3	3.36249	3.068	2.41065		0.503245	0.96805	1.46411		2.94705	0.978469		0.332017	0.00960472	Downregulated
ENSDARG00000042641	cyp51	10.0851	16.6204	8.31029		2.60727	4.19306	5.19672		11.6719	3.99902		0.342619	0.00410675	Downregulated
ENSDARG00000098315	cyp1a	34.0526	9.94189	8.23376		7.10712	5.77156	5.78557		17.4094	6.22141		0.357359	0.0069876	Downregulated
ENSDARG00000068726	masp1	11.9024	25.9124	11.6625		5.20286	5.24022	7.6557		16.4924	6.03293		0.3658	0.00253321	Downregulated
ENSDARG00000102364	si:dkey-202l22.6	26.8423	64.5317	33.8787		11.0366	12.0983	23.1745		41.7509	15.4365		0.369728	0.00442487	Downregulated
ENSDARG00000026369	dbi	304.334	133.544	387.186		67.365	152.02	87.6711		275.021	102.352		0.37216	0.00914531	Downregulated
ENSDARG00000103849	mdh1ab	22.6138	29.3514	30.1824		57.5308	98.9561	108.151		27.3825	88.2125		3.22149	0.00343207	Upregulated
ENSDARG00000023036	si:dkey-23a23.2	2.42281	3.70913	1.47945		10.3464	7.1893	9.25395		2.53713	8.92989		3.51968	0.0060898	Upregulated
ENSDARG00000029955	glb1l	3.51373	5.93246	4.38915		14.8059	17.6289	18.5241		4.61178	16.9863		3.68324	0.00211126	Upregulated
ENSDARG00000011989	crx	16.1085	27.3593	8.51897		124.507	20.4579	54.1638		17.3289	66.3764		3.83038	0.00869975	Upregulated
ENSDARG00000096901	si:dkey-7i4.11	1.00267	1.97359	0.442651		4.46226	2.81191	6.74026		1.13964	4.67147		4.09909	0.00426398	Upregulated
ENSDARG00000099641	znf569l	0.520056	1.5747	0.649226		3.39875	4.33498	3.69463		0.91466	3.80945		4.16489	0.0097603	Upregulated
ENSDARG00000043483	otx5	11.357	27.6157	6.02202		119.22	17.0287	52.3854		14.9982	62.8779		4.19235	0.00516516	Upregulated
ENSDARG00000095432	si:rp71-26b20.1	4.25622	4.80109	1.72203		15.7191	12.4024	17.0816		3.59311	15.0677		4.1935	0.00200014	Upregulated
ENSDARG00000099605	FO834829.1	0.925464	0.958561	0.382453		2.59824	3.20494	3.89074		0.755492	3.23131		4.27709	0.00728864	Upregulated
ENSDARG00000096157	si:dkey-40n15.1	0.0999001	0.314591	0.0748278		0.80738	0.712334	0.583802		0.163106	0.701172		4.29887	0.00861687	Upregulated
ENSDARG00000091994	wu:fb96d11	0.137762	0.144607	0.0393094		0.439852	0.590306	0.63142		0.107226	0.553859		5.16535	0.00416779	Upregulated
ENSDARG00000092272	si:dkey-248g17.3	0.781017	3.31997	0.560739		7.02851	10.465	7.02088		1.55391	8.17146		5.25865	0.00386479	Upregulated
ENSDARG00000097453	si:ch211-225b7.5	1.04774	0.312368	2.00077		6.46537	7.89986	5.61492		1.12029	6.66005		5.94492	0.00813823	Upregulated
ENSDARG00000098222	ccbl2	0.67797	0.673335	0.696435		3.55138	4.76615	3.94642		0.68258	4.08798		5.98902	0.000700654	Upregulated
ENSDARG00000070126	si:dkey-22l11.6	0.107242	0.436425	0.385569		2.46532	1.20626	1.96613		0.309745	1.87924		6.06705	0.00638145	Upregulated
ENSDARG00000098354	CR388206.1	0.111441	0.188964	0.0715473		0.900649	0.492442	0.893863		0.123984	0.762318		6.14853	0.00706286	Upregulated
ENSDARG00000102430	zgc:158340	0.432786	0.782775	0.395177		6.97818	0.96201	2.14233		0.536913	3.36084		6.25957	0.00209728	Upregulated
ENSDARG00000087714	si:ch211-226o13.1	0.193566	0.554508	0.122473		1.25957	1.61603	2.59987		0.290182	1.82515		6.28968	0.00160034	Upregulated
ENSDARG00000100750	si:dkey-199m13.9	0.0543029	0.042093	0.167346		0.455124	0.41011	0.905969		0.0879138	0.590401		6.71568	0.00957298	Upregulated
ENSDARG00000040536	si:ch211-276c2.5	0.0382719	0.0556247	0.0819046		0.320764	0.476607	0.438539		0.0586004	0.41197		7.03017	0.00579387	Upregulated
ENSDARG00000087131	ifnlr1	0.423269	1.55537	0.218766		4.5802	3.13761	7.86256		0.732467	5.19345		7.09036	0.000643753	Upregulated
ENSDARG00000090192	si:dkey-16p6.1	0.0608736	0.0663557	0.0130274		0.264208	0.42183	0.404563		0.0467522	0.363534		7.77575	0.00152095	Upregulated
ENSDARG00000102401	zgc:174234	0.0603696	0.292472	0.137808		1.08422	0.856884	1.91845		0.16355	1.28652		7.86619	0.00247572	Upregulated
ENSDARG00000097872	si:ch211-137j23.6	0.0336817	0.0326355	0.057665		0.16131	0.28414	0.555758		0.0413274	0.333736		8.07542	0.00654156	Upregulated
ENSDARG00000098960	CABZ01051641.2	0.129084	0.406494	0.05525		1.50691	1.81494	1.5087		0.196943	1.61018		8.17589	0.00168266	Upregulated
ENSDARG00000088142	ENSDARG00000088142	0.02977	0.252397	0.152904		1.19408	0.7893	1.59644		0.145024	1.19327		8.22814	0.00276753	Upregulated
ENSDARG00000013335	anxa6	2.0416	2.94593	2.91698		24.3037	30.6226	22.8754		2.63484	25.9339		9.8427	3.11642e-07	Upregulated
ENSDARG00000056719	slc6a19b	0.19917	0.289476	0.31968		1.75871	2.03025	4.33618		0.269442	2.70838		10.0518	0.000309405	Upregulated
ENSDARG00000102858	CD200 (3 of 3)	0.0673275	0.0652362	0.0576343		0.644897	0.730256	0.540032		0.0633993	0.638395		10.0694	0.000939212	Upregulated
ENSDARG00000101594	ENSDARG00000101594	0.0123219	0.119392	0.0210959		0.619635	0.296995	0.643832		0.0509366	0.520154		10.2118	0.00138379	Upregulated
ENSDARG00000103755	RNH1 (45 of 55)	0	0.220495	0.0162334		0.442756	0.883688	1.09517		0.0789096	0.807204		10.2295	0.00529981	Upregulated
ENSDARG00000104504	CU457794.1	0.056619	0.192011	0		0.508431	0.773322	1.34944		0.0828768	0.877066		10.5828	0.00196669	Upregulated
ENSDARG00000069787	tmc6a	0.0466323	0.0790718	0.0199593		0.209376	0.636921	0.705327		0.0485545	0.517208		10.6521	0.000295133	Upregulated
ENSDARG00000103019	gstp2	0.180947	0.0350654	0.278813		0.346642	3.37279	1.62554		0.164942	1.78166		10.8017	0.00186056	Upregulated
ENSDARG00000098714	RNH1 (21 of 55)	0.0338985	0.0766397	0		0.14882	0.453919	0.621484		0.0368461	0.408074		11.0751	0.00282409	Upregulated
ENSDARG00000098987	si:dkeyp-75d2.5	0	0.113715	0		0.477759	0.414881	0.387296		0.037905	0.426645		11.2556	0.00686317	Upregulated
ENSDARG00000100340	BX901907.2	0.15711	0.387495	0.110038		2.46253	2.62782	2.47453		0.218214	2.52163		11.5557	0.000552576	Upregulated
ENSDARG00000090977	ifit12	0.0219399	0.106292	0.0187812		0.210151	0.898987	0.623469		0.0490044	0.577536		11.7854	0.00108081	Upregulated
ENSDARG00000094427	si:dkey-253d23.8	0.0796807	0.810661	0.102314		5.00865	2.08059	4.85729		0.330885	3.98218		12.0349	0.000433176	Upregulated
ENSDARG00000101544	BX004873.5	0.0196293	0.275785	0.0336066		1.35139	1.25378	1.62845		0.109674	1.41121		12.8673	0.00130087	Upregulated
ENSDARG00000101103	BX548173.2	0	0.304249	0		1.33032	1.06733	1.54991		0.101416	1.31585		12.9748	0.00315805	Upregulated
ENSDARG00000034207	si:dkey-91f15.8	0	0.108609	0.027415		0.575174	0.514611	0.822009		0.0453412	0.637265		14.0549	0.000185377	Upregulated
ENSDARG00000101642	si:ch211-155m12.1	0.0181051	0.157885	0.0774925		0.238453	2.15284	1.21156		0.0844941	1.20095		14.2134	0.000506662	Upregulated
ENSDARG00000094854	ms4a17a.8	0.458318	1.71712	0.0523112		7.4996	18.6814	7.14226		0.742583	11.1078		14.9583	8.85228e-05	Upregulated
ENSDARG00000092926	si:dkey-66k12.3	0	0.566891	0.31302		4.0279	4.99437	4.15646		0.293303	4.39291		14.9774	0.000940311	Upregulated
ENSDARG00000015065	c4	0.01303	0.00841685	0.0334622		0.135209	0.32453	0.366294		0.018303	0.275345		15.0437	0.000218395	Upregulated
ENSDARG00000096978	si:ch1073-147e4.1	0.0176041	0.125087	0.120557		1.82673	0.881622	2.00103		0.0877491	1.56979		17.8896	0.0003104	Upregulated
ENSDARG00000097247	si:dkey-19d21.2	0.686086	0.0810702	0.787854		12.4221	10.0296	5.8137		0.518337	9.42179		18.177	2.29907e-05	Upregulated
ENSDARG00000093130	si:dkey-82k12.7	0.0599496	0.0580875	0		0.358892	1.44496	0.549547		0.0393457	0.784467		19.9378	0.00722013	Upregulated
ENSDARG00000060007	N4BP3	0.132098	0.127995	0.0188466		1.95067	1.04363	2.58329		0.0929798	1.8592		19.9957	3.47613e-05	Upregulated
ENSDARG00000100234	BX511246.1	0.0155022	0	0		0.0928049	0.143232	0.170527		0.00516739	0.135521		26.2262	0.00132314	Upregulated
ENSDARG00000093323	si:ch211-114l13.1	0.0369838	0	0		0	0.475424	0.525488		0.0123279	0.333637		27.0635	0.00562118	Upregulated
ENSDARG00000104423	si:dkey-54i3.4	0	0.26645	0.0784668		2.96326	1.69385	4.90155		0.114972	3.18622		27.713	2.45257e-06	Upregulated
ENSDARG00000101310	BX004873.4	0	0.296159	0.142717		4.09213	3.438	4.63582		0.146292	4.05532		27.7207	7.04831e-07	Upregulated
ENSDARG00000095569	CABZ01059309.1	0	0.0735868	0		0.484965	0.854241	0.719387		0.0245289	0.686198		27.975	0.000136526	Upregulated
ENSDARG00000096029	si:ch211-187d1.3	0	0.0170067	0		0.105076	0.183323	0.193074		0.00566891	0.160491		28.3107	0.00286365	Upregulated
ENSDARG00000097060	si:ch211-207n23.3	0	0.00985897	0		0.0121827	0.0817493	0.214527		0.00328632	0.10282		31.2871	0.00734789	Upregulated
ENSDARG00000102994	si:dkey-78o7.1	0	0.0150059	0		0.278142	0.111985	0.0851798		0.00500198	0.158435		31.6745	0.0043923	Upregulated
ENSDARG00000101556	si:ch1073-475a24.1	0	0.0938062	0		0.347748	0.868576	2.47013		0.0312687	1.22882		39.2986	1.77657e-05	Upregulated
ENSDARG00000052037	trim35-1	0	0	0.0477684		0.0556775	0.978862	0.861076		0.0159228	0.631872		39.6834	0.000383316	Upregulated
ENSDARG00000091627	si:dkey-271j15.3	0.392465	0.16637	0.125986		9.04565	7.64648	13.6036		0.228273	10.0986		44.239	6.94066e-09	Upregulated
ENSDARG00000099432	si:ch211-246b8.1	0.00821462	0	0		0.10819	0.151797	0.203315		0.00273821	0.154434		56.3998	2.4505e-05	Upregulated
ENSDARG00000045453	f13a1a.1	0	0	0.0152753		0.587546	0	0.310795		0.00509176	0.299447		58.8101	0.00162575	Upregulated
ENSDARG00000100652	zgc:175008	0	0.0775481	0.0513836		3.1383	4.16355	3.0997		0.0429772	3.46718		80.6749	1.62748e-09	Upregulated
ENSDARG00000025046	AL935186.1	0	0	0.0277668		0.446626	0.677579	1.29344		0.00925561	0.805881		87.0695	4.61915e-07	Upregulated
ENSDARG00000089195	pcdh2g20	0	0.0222795	0		0.578146	0.0184739	1.64408		0.00742652	0.746901		100.572	0.000333947	Upregulated
ENSDARG00000093747	si:dkey-122c11.1	0	0.0529621	0		11.9765	10.6715	9.26957		0.017654	10.6392		602.648	2.26128e-12	Upregulated
ENSDARG00000094951	BX072532.2	0	0	0		2.62595	3.55455	4.30691		0	3.4958		Inf	2.66698e-15	Upregulated
ENSDARG00000095522	si:dkey-71b5.3	0	0	0		5.09089	3.61072	8.04202		0	5.58121		Inf	3.01949e-13	Upregulated
ENSDARG00000089031	larsa	0	0	0		6.20755	3.31934	3.56445		0	4.36378		Inf	1.70714e-08	Upregulated
ENSDARG00000099764	si:dkey-74i1.3	0	0	0		0.835147	3.75803	1.35403		0	1.9824		Inf	1.77406e-07	Upregulated
ENSDARG00000093926	si:dkey-71b5.2	0	0	0		0.962876	2.16911	2.10627		0	1.74608		Inf	3.19264e-06	Upregulated
ENSDARG00000101819	si:ch1073-121p1.1	0	0	0		2.38172	2.16227	1.28716		0	1.94372		Inf	0.000150023	Upregulated
ENSDARG00000084828	SNORA68	0	0	0		4.69389	1.85279	4.4393		0	3.66199		Inf	0.000233011	Upregulated
ENSDARG00000069189	si:dkey-242h9.3	0	0	0		0	0	3.32906		0	1.10969		Inf	0.000469153	Upregulated
ENSDARG00000037691	pcdh2ab2	0	0	0		0.19955	0.008369	0.343752		0	0.183891		Inf	0.000484031	Upregulated
ENSDARG00000104928	si:dkey-206d17.11	0	0	0		0.827236	0.605563	0.460615		0	0.631138		Inf	0.000700937	Upregulated
ENSDARG00000098541	si:dkey-54f18.3	0	0	0		0.434796	0.350113	0.798928		0	0.527946		Inf	0.00190466	Upregulated
ENSDARG00000096014	si:ch211-197e10.2	0	0	0		0.160059	0.644424	0.204239		0	0.336241		Inf	0.00203913	Upregulated
ENSDARG00000089814	si:dkey-81i14.3	0	0	0		0.102652	0.0258309	0.235776		0	0.12142		Inf	0.00221121	Upregulated
ENSDARG00000086277	aldh1l1	0	0	0		0.423242	0.639017	0.121515		0	0.394591		Inf	0.00313848	Upregulated
ENSDARG00000074024	si:ch211-152n14.4	0	0	0		0.187686	0.034348	0.182885		0	0.134973		Inf	0.00350552	Upregulated
ENSDARG00000040765	drd6b	0	0	0		0.174722	0.234487	0.200655		0	0.203288		Inf	0.00377395	Upregulated
ENSDARG00000104586	CU302413.1	0	0	0		0.156635	0.105106	0.299805		0	0.187182		Inf	0.00402069	Upregulated
ENSDARG00000095699	dicp1.9	0	0	0		0.0861015	0.250365	0.175788		0	0.170752		Inf	0.00473515	Upregulated
ENSDARG00000093131	si:ch211-57f7.7	0	0	0		0.402133	0.0179895	0.0821011		0	0.167408		Inf	0.00477985	Upregulated
ENSDARG00000104536	FQ377882.2	0	0	0		0.429855	0.384593	1.42612		0	0.746855		Inf	0.00534652	Upregulated
ENSDARG00000099964	si:ch211-129n18.1	0	0	0		0.0754659	0.101279	0.0433334		0	0.0733596		Inf	0.00621639	Upregulated
ENSDARG00000090107	CR974475.2	0	0	0		0.0918881	0	0.34003		0	0.143973		Inf	0.00812936	Upregulated
ENSDARG00000092580	si:ch211-95j8.3	0	0	0		0.472841	0.158645	0.108604		0	0.246697		Inf	0.00870764	Upregulated
ENSDARG00000076015	PLBD1 (2 of 2)	0	0	0		0.171275	0.11493	0.0749318		0	0.120379		Inf	0.0095399	Upregulated
